# Supplementary material for: sec-Butyl alcohol assisted pinhole-free perovskite film growth for high-performance solar cells
Source: Royal Society of Chemistry journal article supplement (doi:10.1039/c5ta07983g), 2016-01-01
Supplement: c5ta07983g1.pdf [file c5ta07983g1.pdf]

## Supplementary Information

# Sec-butyl alcohol assisted pinhole-free perovskite film growth for high-performance solar cells

Fan Zhang,<sup>‡ab</sup> Jiarong Lian,<sup>‡b</sup> Jun Song,<sup>\*b</sup> Yuying Hao,<sup>a</sup> Pengju Zeng<sup>b</sup> and Hanben Niu<sup>b</sup>

<sup>a</sup>. Taiyuan Univ Technol, Coll Phys & Optoelect, Key Lab Adv Transducers & Intelligent Control Sys, Minist Educ, Taiyuan 030024, China.

<sup>b</sup>. Institute of Optoelectronics, Key Lab of Optoelectronics Devices and Systems of Ministry of Education/Guangdong Province, Shenzhen University, 518060, Shenzhen, China; and Key Laboratory of Micro-Nano Measuring and Imaging in Biomedical Optics, College of Optoelectronic Engineering, Shenzhen University, Shenzhen 518060, China. E-mail: songjun@szu.edu.cn

<sup>‡</sup> These authors contributed equally to this work.

## Experimental

### Material synthesis and purification

The CH<sub>3</sub>NH<sub>3</sub>I crystal was synthesized using the method described by Lee et al.<sup>1</sup> A concentrated aqueous solution of hydroiodic acid (HI) (15.0 ml, 57 wt% in water, Aldrich) was reacted with methylamine (CH<sub>3</sub>NH<sub>2</sub>) (13.5 ml, 40 wt% in aqueous solution, Aldrich) at 0 °C for 2 h with constant stirring under nitrogen atmosphere. The precipitate was recovered by evaporation at 70 °C for 1 h. MAI was dissolved in ethanol at 80 °C, recrystallized from the supersaturated solution at room temperature, and dried at 60 °C in a vacuum oven for 12 h. PbI<sub>2</sub> (Aladdin, 98%) was dissolved in DMF (Aldrich, 99.9%) at low concentration (0.5 M). After filtrating and concentrating, the PbI<sub>2</sub> crystal recrystallized from the supersaturated solution. Then, the PbI<sub>2</sub> crystal was filtered and dried at 80 °C in a vacuum oven for 24 h.

### Solar cell fabrication

After cleaning the indium tin oxide (ITO) substrate, a poly(3,4-ethylenedioxythiophene) poly(styrenesulphonate) (PEDOT: PSS) layer was spun on ITO at 2000 rounds per minute (rpm).

For the traditional fast crystallization process, the PbI<sub>2</sub> and MAI precursors with a 1:1 molar ratio (PbI<sub>2</sub> 461 mg and MAI 159mg) were dissolved in 1 mL of DMF and 100 μL of N,N-dimethyl sulfoxide (DMSO). The mixture solution was then spin coated on the PEDOT: PSS layer at 6,000 rpm; after 5s delay time, the wet films were selectively washed with 300 μL of toluene, chlorobenzene, or sec-butyl alcohol. The films were then annealed in ambient air at 100 °C for 5 min.

For the modified 270 nm thick film, a mixture solution with a 1:2 optimal PbI<sub>2</sub>:MAI molar ratio (461mg: 318 mg) was used as example. The mixture solution was spin coated on the PEDOT: PSS layer at 6,000 rpm, the wet film was selectively washed with 300 μL of sec-butyl alcohol after 7s delay time. At this step, the film change from yellow to light brown. After 30s spin-coating stopped, 200 μL sec-butyl alcohol were dipped onto perovskite film. 10 s is an optimal time at this step. After sec-butyl alcohol soaking step, the films were spun on the perovskite layer at 6,000 rpm for 30 s, and then annealed in ambient air at 100 °C for 30 min. In this study, the optimal soaking time for different PbI<sub>2</sub>:MAI molar ratio was investigated.

The devices with different precursor ratios were optimized in terms of the thickness, 110 nm (PbI<sub>2</sub> 230.5 mg and MAI 159mg), 190nm (PbI<sub>2</sub> 322.7 mg and MAI 222.6 mg), 270 nm (PbI<sub>2</sub> 461 mg and MAI 318 mg), 450 nm (PbI<sub>2</sub> 691.5 mg and MAI 357.75 m), 610 nm (PbI<sub>2</sub> 922 mg and MAI 477 mg). In addition, they were dissolved in 1 mL of DMF and 100 μL of DMSO.

The spin coating process is typically conducted in the glove box under nitrogen atmosphere and with a real-time humidity of 15%. The films were then annealed in ambient air at 100 °C for 30 min.

Subsequently, [6,6]-phenyl-C<sub>61</sub>-butyric acid methyl ester (PCBM) was dissolved in chlorobenzene at a concentration of 20 mg/ml and spun on the perovskite layer at 2,500 rpm. The devices were completed by evaporating a 100-nm-thick aluminium film as the electrode with an active area of 0.09 cm<sup>2</sup>.

### Characterization

Ultraviolet-visible (UV) light absorption spectra were analyzed to assess the absorption properties of the perovskite film with a UV-VIS spectrophotometer (UV-2600). Scanning electron microscopy (SEM) images and X-ray diffraction (XRD) patterns of the films were obtained with a Zeiss Supra 55 microscope and a Bruker QUANTAX 200 diffractometer, respectively. A sun simulator (Zolix Sirius-SS) was used to provide simulated solar irradiation (AM 1.5, 100 mW/cm<sup>2</sup>). Current-voltage characteristics were measured using a Keithley 2400 source meter. The output of the light source was adjusted using a calibrated silicon photodiode (ABET technology). The J-V curves were measured by backward—forward bias (1.5 V) → negative bias (-0.5 V)—or forward—negative bias (-0.5 V) → forward bias (1.5 V)—scan. The step voltage was fixed at 10 mV and the delay time, which is a set delay at each voltage step before the current is measured, was modulated. The internal PCE (IPCE) was measured using a power source (Zolix Sirius-SS) with a monochromator (Zolix Omni-λ) and a source meter (Keithley 2400).

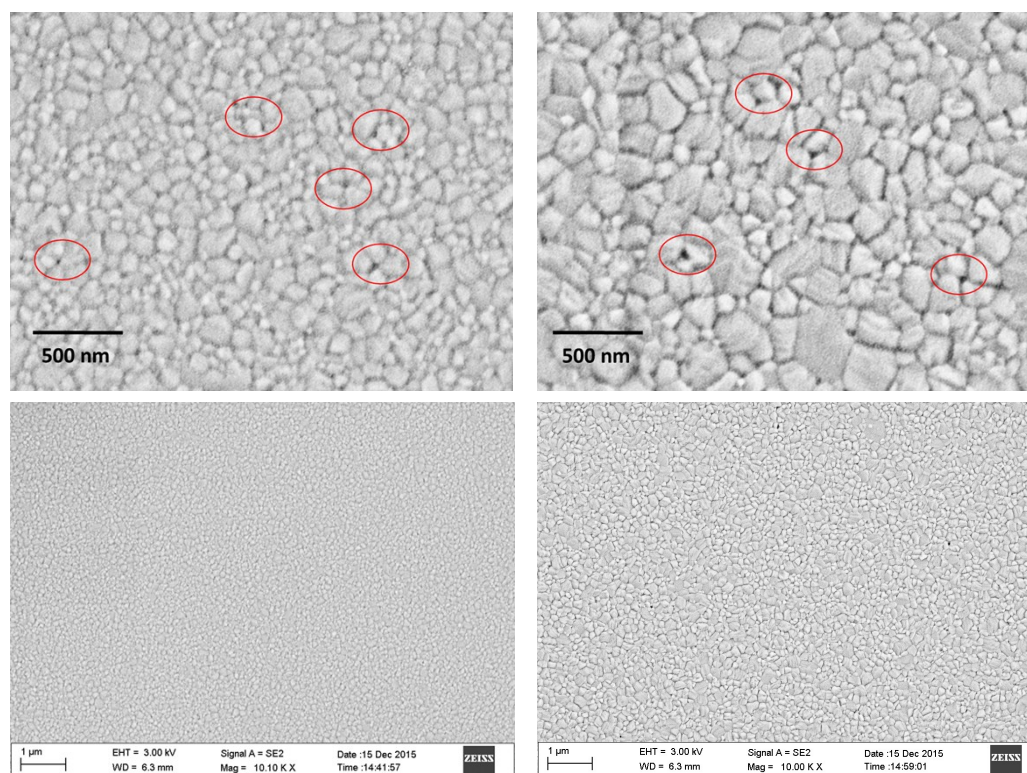

**Fig. S1** Plane-view scanning electron microscopy images for the CH<sub>3</sub>NH<sub>3</sub>PbI<sub>3</sub> perovskite films, the wet films were washed with (a, c) toluene, (b, d) chlorobenzene. The films were produced in N<sub>2</sub> glove box (H<sub>2</sub>O < 1 ppm). It is obviously that less pinholes were present in the film.

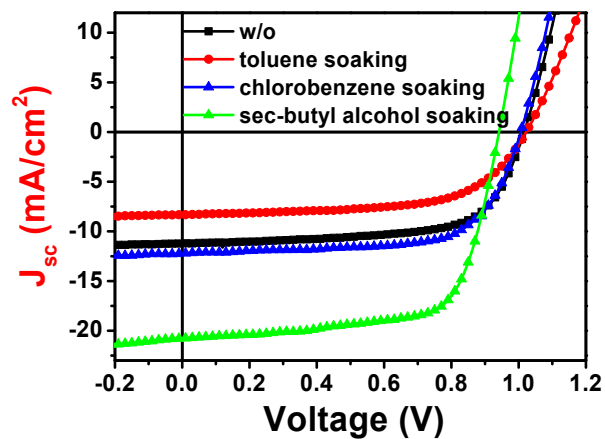

**Fig. S2** The photocurrent curves of the devices with different soaking solvent toluene (red), chlorobenzene (blue), and sec-butyl alcohol (green). Toluene and chlorobenzene as nonpolar solvent are difficult to dissolve MAI and unable to remove the excess of MAI in the films.

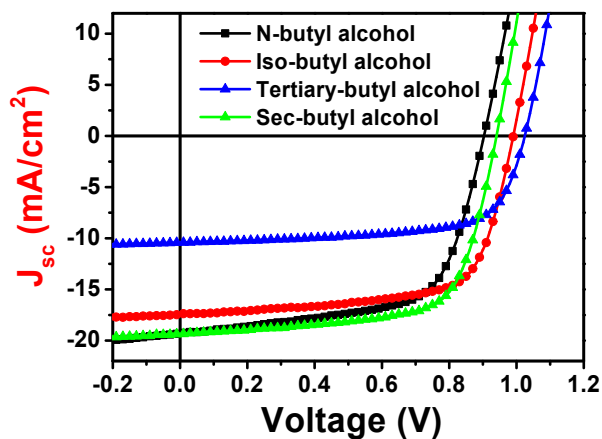

**Fig. S3** The photocurrent curves of the devices with different soaking solvents: n-butyl alcohol (black), iso-butyl alcohol (red), ter-butyl alcohol (blue) and sec-butyl alcohol (green).

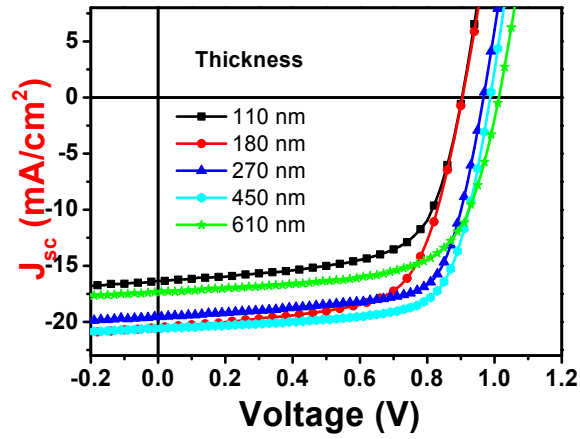

**Fig. S4** The photocurrent curves of the devices with different film thickness.

**Table S1** Photovoltaic performance of perovskite solar cells based on different film thickness.

| Thickness (nm) | $J_{sc}$ ( $\text{mA}/\text{cm}^2$ ) | $V_{oc}$ (V) | FF (%) | PCE   |
|----------------|--------------------------------------|--------------|--------|-------|
| 110            | 16.35                                | 0.90         | 66.6   | 9.8   |
| 190            | 20.5                                 | 0.904        | 65.1   | 12.07 |
| 270            | 19.54                                | 0.967        | 70.6   | 13.35 |
| 450            | 20.6                                 | 0.99         | 71.0   | 14.4  |
| 610            | 17.3                                 | 1.01         | 65.8   | 11.6  |

## Notes

1 M. M. Lee, J. Teuscher, T. Miyasaka, T. N. Murakami and H. J. Snaith, *Science*, 2012, 338, 643.
